# Supplementary material
Source: publisher figshare collection journal article supplement (https://acs.figshare.com/ndownloader/files/33208840)
Supplement: Supplementary file 1 [file 33208840]

## **Supplementary Information**

### **Self-Powered Monitoring of Ammonia Using an MXene/TiO<sub>2</sub>/Cellulose Nanofiber Heterojunction-Based Sensor Driven by an Electrospun Triboelectric Nanogenerator**

Sagar Sardana<sup>a</sup>, Harpreet Kaur<sup>a</sup>, Bindiya Arora<sup>a</sup>, Dinesh Kumar Aswal<sup>b</sup>, Aman Mahajan<sup>a\*</sup>

*<sup>a</sup>Department of Physics, Guru Nanak Dev University, Amritsar 143005, India*

*<sup>b</sup>Health, Safety and Environment Group, Bhabha Atomic Research Centre, Mumbai 400085, India*

#### **\*Corresponding Author**

**Department of Physics, Guru Nanak Dev University, Amritsar-143005, India.**

**Tel.: 91-183-2258802, Ext.: 3470, Fax: 91-183-2258820**

**Email: aman.phy@gndu.ac.in**

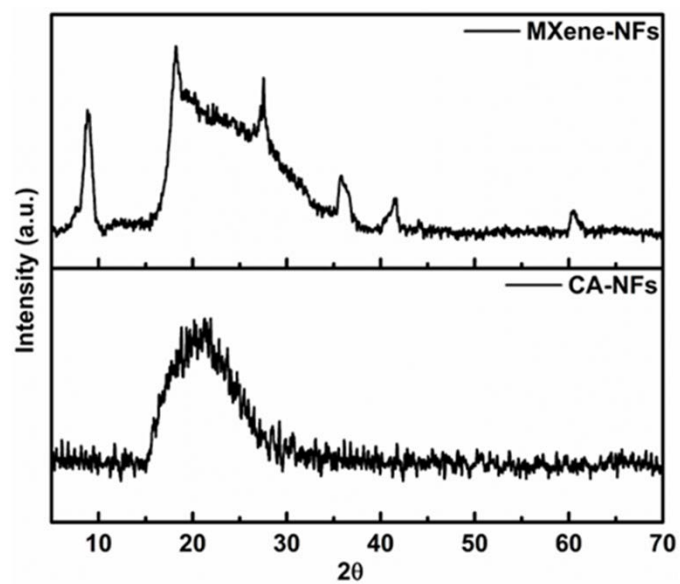

**Figure S1.** XRD spectra of (a) MXene-NFs and CA-NFs

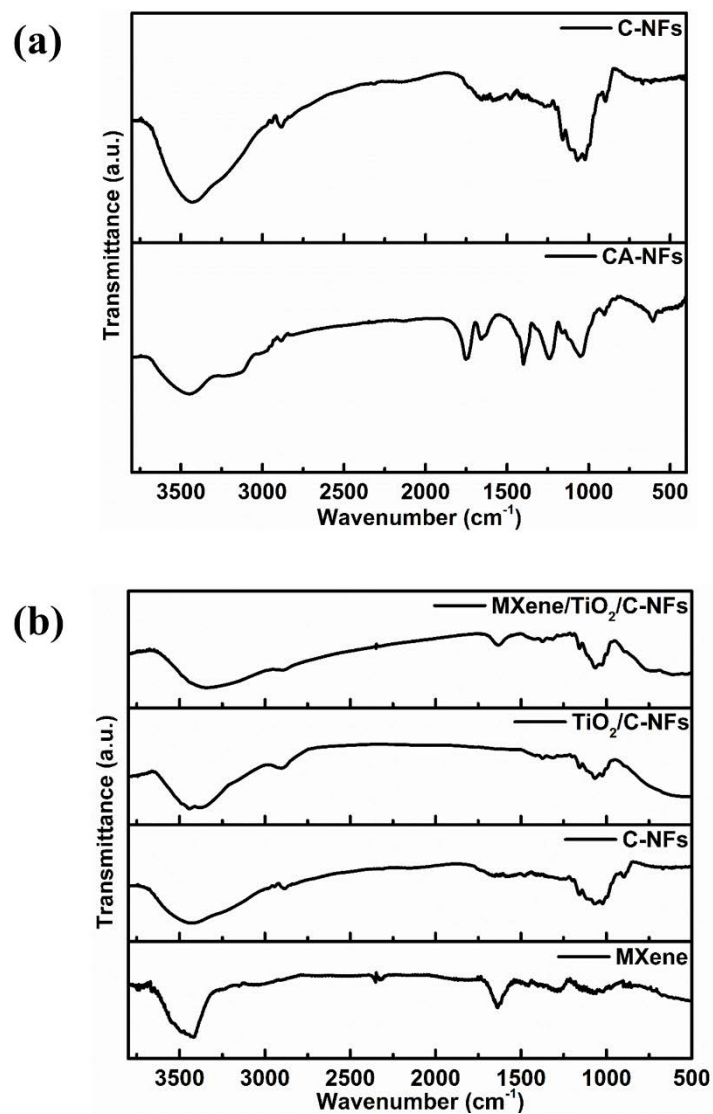

**Figure S2.** FTIR spectra of (a) CA-NFs and C-NFs and (b) MXene, C-NFs, TiO<sub>2</sub>/C-NFs and MXene/TiO<sub>2</sub>/C-NFs heterojunctions based sample

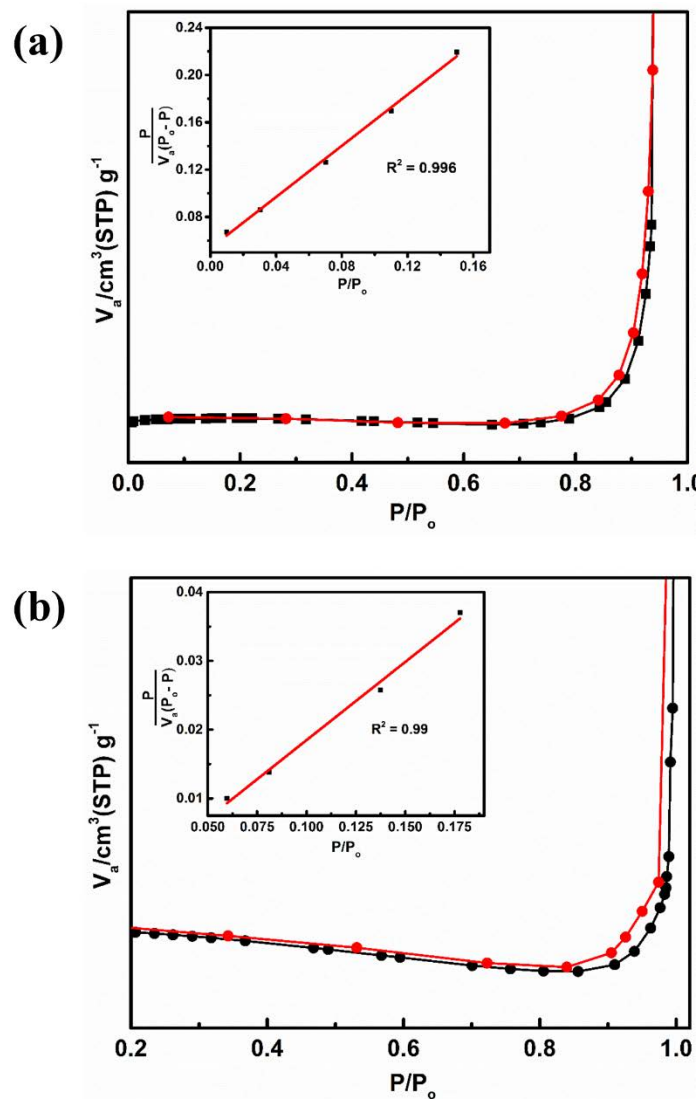

**Figure S3.** BET studies of (a) MXene and (b) MXene/TiO<sub>2</sub>/C-NFs heterojunctions based sample

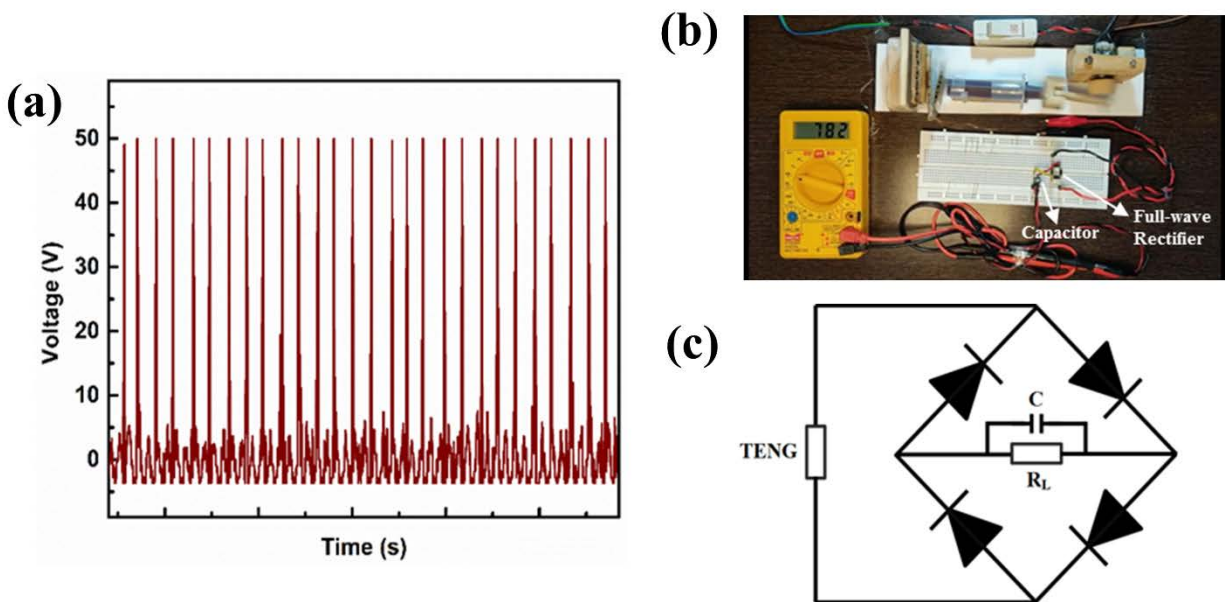

**Figure S4.** (a) Output DC voltage of MXene/CA-NFs combination based TENG, (b) Photograph of capacitor charging, (c) Equivalent circuit used to charge  $4.7 \mu\text{F}$  capacitor.

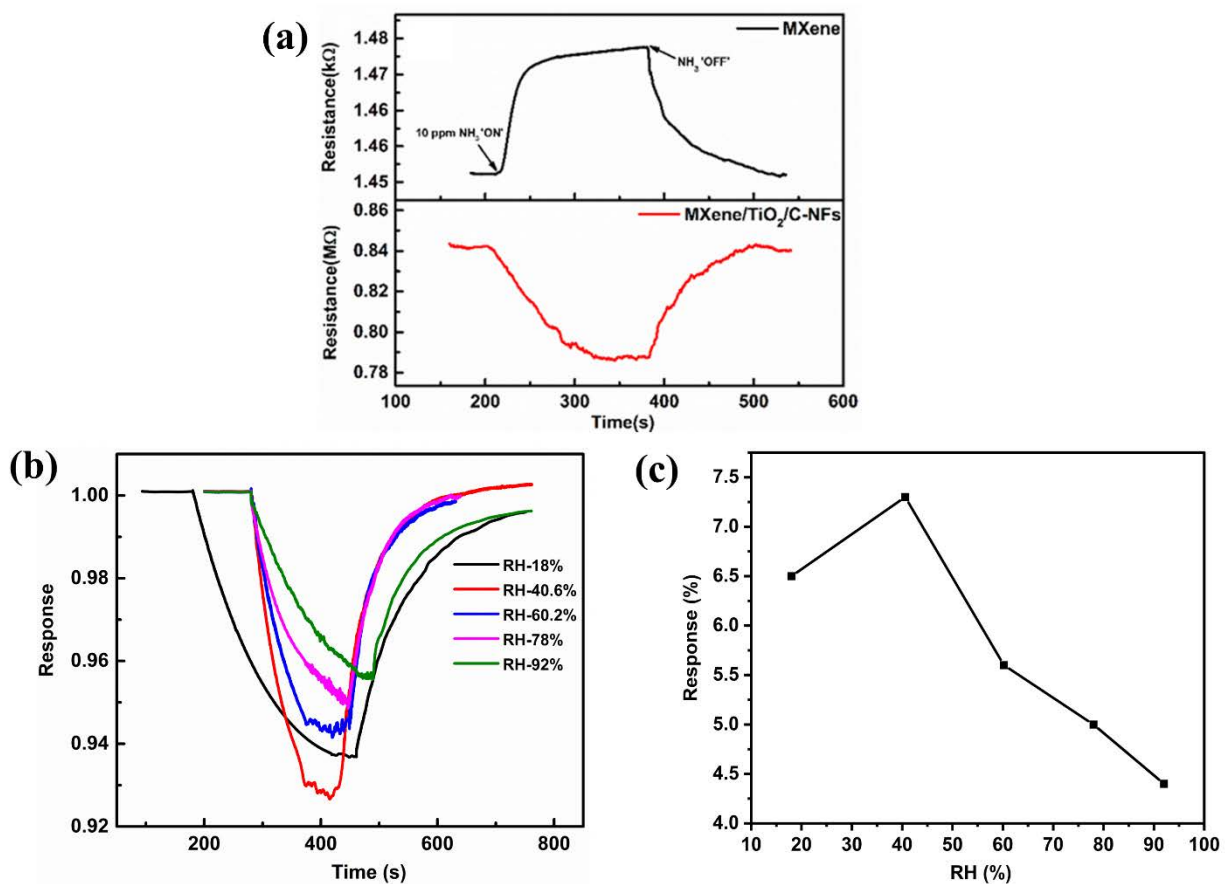

**Figure S5.** (a) Resistance-time graph of MXene and MXene/TiO<sub>2</sub>/C-NFs heterojunctions based sensor for 10 ppm NH<sub>3</sub> at room temperature, (b) Response curves of MXene/TiO<sub>2</sub>/C-NFs heterojunctions based sensor and (c) Response (%) variation for different relative humidity.

### DFT calculations:

Structure optimization and band gap calculations of MXene and TiO<sub>2</sub> were carried out by the Vienna ab initio simulation package (VASP) code using MedeA as graphical user interface. Generalized gradient approximation (GGA) with the Perdue Burke–Ernzerhof (PBE) was employed for the exchange–correlation function. Using the conjugate gradient algorithm, the positions of atoms were fully relaxed and total energies were well converged to 10<sup>-6</sup> eV. The cut off energy of 520 and 400 eV for MXene and TiO<sub>2</sub>, respectively, were set for plane wave basis set. The Brillouin zone integration was sampled by Monkhorst–Pack k-point mesh for geometry optimizations of 5 × 5 × 1 grid of MXene and 6 × 6 × 6 grid of TiO<sub>2</sub>. Finally, the band structures of fully relaxed unit cells of MXene and TiO<sub>2</sub> were carried out with a finer mesh of 10 × 10 × 1 and 10 × 10 × 10 k-points, respectively. A vacuum space of 15 Å was added along the c-axis direction of MXene layer to avoid inter layer interaction.

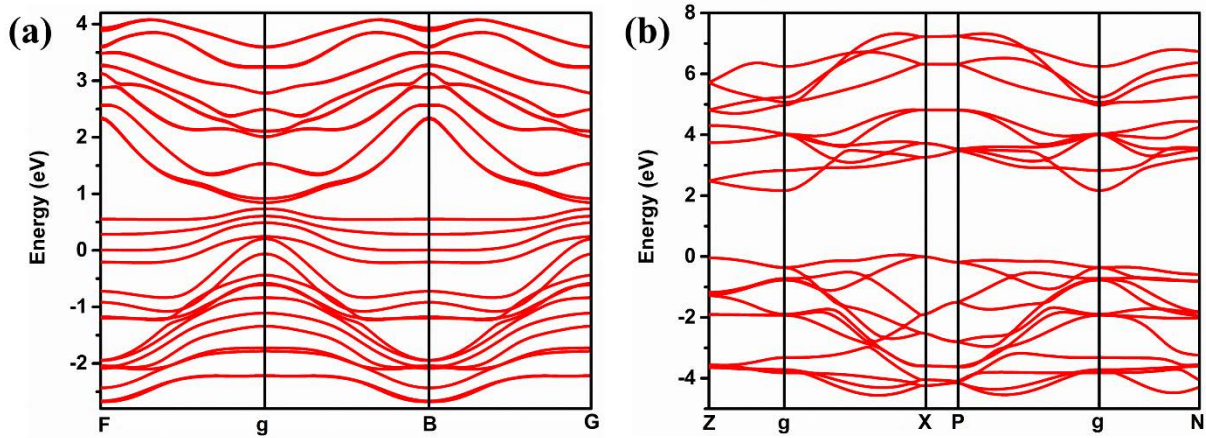

**Figure S6.** (a) Band Structure of (a) MXene and (b) TiO<sub>2</sub> unit cell

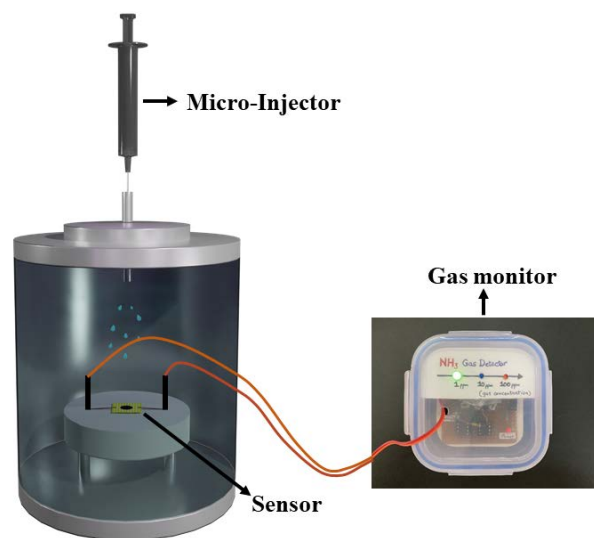

**Figure S7.** A gas monitoring device



**Video S1:** The working of home-made tapping device; charging of capacitor and powering of LEDs using TENG.

**Video S2:** The working of  $\text{NH}_3$  monitoring device;  $\text{NH}_3$  concentration at 1 ppm, 10 ppm and 100 ppm can lighten three different LEDs.

**Video S3:** The monitoring device embedded in shoe insoles is directly driven by TENG.
